# Supplementary material for: Substance abuse and academic performance among university students: systematic review and meta-analysis
Source: Research Square preprint supplement (doi:10.21203/rs.3.rs-6221134/v1), 2025-04-16
Supplement: Supplementary file 1 [file 195bdc9fbede4290779eddf7.docx]

**Additional file 1**

| **Search** | **Terms** | **Results of the MEDLINE, CINHAL, Scopus, ERIC database** |
| --- | --- | --- |
| 1 | “*Students*”, *“School Enrollment”, “Universities”* | 15,149 |
| 2 | "[*Alcohol-Induced Disorders*](https://www.ncbi.nlm.nih.gov/mesh/68020751)*”, “Alcohol drinking”, “*[*Binge Drinking*](https://www.ncbi.nlm.nih.gov/mesh/68063425)*”, “Abuse, Marijuana”, “Hashish Abuse”, “Cannabis Abuse”, “*[*Substance-Related Disorders*](https://www.ncbi.nlm.nih.gov/mesh/68019966)*”, “Cannabis Related Disorder”, “Drug Use Disorders”, “Substance Abuse”, “Substance Addiction”, “Drug Dependence”,* | 787,715 |
| 3 | *“Academic success”, “Academic achievement”, Academic performance”, “Academic test score*”. | 46,396 |
| 1 AND 2 AND 3 |  | 1,476 |
