# Supplementary material for: Substance abuse and academic performance among university students: systematic review and meta-analysis
Source: Research Square preprint supplement (doi:10.21203/rs.3.rs-6221134/v1), 2025-04-16
Supplement: Supplementary file 2 [file 2969e8f1723bcf067226e091.docx]

**Additional file 2 Description of included studies**

| **Author, year, country** | **Aim** | **Study design (follow-up time)** | **Sample** | **Substances considered** | **Academic achievement measurement** | **Included in the meta-analysis** |
| --- | --- | --- | --- | --- | --- | --- |
| Akua and Samek (2023)  USA | To explore the associations between both alcohol and cannabis use with academic performance | Longitudinal (4 year follow up) | *Number:* 209  *Data:* 129 females, 80 males, mean age 20.8 (± 3.9)  *Setting:* Freshman students | ALCOHOL, and CANNABIS | Self-report data ranged from 1 to 5 | No |
| Olorunleke et al. (2023)  Nigeria | To measure the association of alcohol and smoking cigarettes on academic performance | Descriptive | *Number:* 400  *Data:* -  *Setting:* college students Oro, Kwara State. | ALCOHOL, and TABACCO | Self-report data of grade | No |
| Petkeviciene et al. (2022)  Lithuania | To evaluate the associations of academic achievements, and satisfaction with frequency and amount of alcohol consumption, drinking problems, smoking and drug use frequency | Cross-sectional surveys conducted in 2000, 2010, and 2017 | *Number:* 3325  *Data:* 1984 females, 1341 males, mean age 20.0 (± 1.7)  *Setting:* first-year students of Kaunas (Lithuania) universities. | ALCOHOL, DRUG (ecstasy, cocaine, LSD, cannabis,…) and SMOKING | Self-report data ranged from 1 to 3 | No |
| Lukas et al. (2021)  Hungary | To measure the frequency of binge drinking and its association with sociodemographic, familiar, and lifestyle factors and school performance | Cross-sectional | *Number:* 1,585  *Data:* 1,186 females, 399 males, ages 19–27  *Setting:* University in Csongrád County, Hungary | ALCOHOL, SMOKING TOBACCO, and OTHER SUBSTANCES (ecstasy, speed, depressants, alcohol combined with depressants, volatile solvents, or herbal drugs) | Self-reported performance (poor, medium, or good) | No |
| Ong et al. (2021)  Australia | To determine the association between individual and multiple health risk behaviours and academic achievement | Cross-sectional secondary analysis | *Number:* 1,543  *Data:* 1,090 females, 453 males, mean age 24.0 (± 7.8)  *Setting:* Newcastle, New South Wales (NSW), Australia, campus in NSW, and campus in Singapore | ALCOHOL, and SMOKING TOBACCO | The self-reported GPA ranged from 0 to 7. | No |
| Arria et al. (2020)  USA | To examine the relationship between substances use during college and two outcomes: having definite plans to attend graduate school and, among individuals with plans, enrolling in graduate school upon college graduation | Longitudinal (6-year follow-up) | *Number:* 980  *Data*: 542 females, 438 males, age NR  *Setting*: a public, mid-Atlantic university | ALCOHOL, and OTHER DRUGS (marijuana, inhalants, cocaine, hallucinogens, heroin, amphetamines/methamphetamine, ecstasy, and three classes of prescription drugs used nonmedically) | Self-reported data: 1) definite plans, 2) possible plans, or 3) no plans for an additional academic degree after college | No |
| El Ansari et al. (2020)  Qatar | To describe the prevalence of alcohol consumption behaviours and to assess whether sociodemographic characteristics and academic performance were associated with alcohol consumption behaviours | Descriptive (1-year follow-up) | *Number:* 1,169  *Data:* 823 females, 346 males, mean age 22.95 (± 5.21)  *Setting:* University of Turku | ALCOHOL | Self-reported data: 1) “How important is it for you to have good grades at university?” (1 very important/2 other); 2) “How do you rate your performance compared to your fellow students?” (1 same, better or much better/2 worse or much worse) | No |
| Paramo et al. (2020)  Spain | To evaluate the association between binge drinking/cannabis consumption and academic achievement, considering academic adjustment as a possible mediator | Cross-sectional | *Number: 258*  *Data: 145 females, 113 males, mean age 18.02 (± 0.15, 18–19)*  *Setting: University of Santiago de Compostela* | ALCOHOL, CANNABIS, and SMOKING | From the university central administrator system, GPA ranged from 1 to 10. | Yes |
| Mercado et al. (2019)  USA | To investigate the association of academic results, romantic relationships, and substance use (tobacco, marijuana, cocaine) with alcohol dependence | Retrospective secondary analysis | *Number: 1,143*  *Data: NR*  *Setting: Mexican-American college* | ALCOHOL | Self-reported GPA ranged from >3.5 to < 1.4. | No |
| Souza et al. (2019)  Brazil | To determine the use of, abuse of, and dependence on alcohol, marijuana, and cocaine, and to identify the association between the use of these substances and the academic performance of undergraduate students | Cross-sectional | *Number: 274*  *Data: 287 females, 87 males, up to 20 years old (28.1%), over 20 years old (13.1%)*  *Setting: university in Ribeirão Preto, Brazil* | ALCOHOL, MARJIUANA, and COCAINE | Self-reported GPA ranged from 0 to 10. | No |
| De la Cruz & Cebrino Cruz (2018)  Spain | To analyse the relationship between high-risk use of alcohol and sociodemographic and academic factors among nursing students | Descriptive and transversal and multicentre (2-month follow-up) | *Number: 129*  *Data: 113 females, 16 males, mean age 20.1 (± 2.67).*  *Setting: universities of Andalusia* | ALCOHOL | Self-reported by students (excellent/very good, good, discrete, bad, very bad) | No |
| Hernandez-Serrano et al. (2018)  Spain | To analyse (1) the frequency of four patterns of polydrug use in the last year (non-dual users of cannabis and tobacco; concurrent users: cannabis and tobacco separately; simultaneous users: tobacco in cannabis “joints”; simultaneous users: tobacco in cannabis joints alongside alcohol) by gender and age; (2) grade point average (GPA) by gender and age; and (3) the association between the frequency of the four patterns of use and the GPA | Descriptive | *Number: 477*  *Data: 268 females, 209 males, mean age 21.3 (± 2.81, 17–40)*  *Setting: university in Girona, Catalonia* | ALCOHOL, SMOKING, and CANNABIS | The self-reported GPA ranged from 0 to 10. | No |
| An et al. (2017)  USA | To examine the relation between binge drinking and academic performance as well as the relation between binge drinking and academic involvement as a mediator between binge drinking and academic performance | Longitudinal (3-year follow-up) | *Number: 7,744*  *Data: NR*  *Setting: Wabash National Study of Liberal Arts Education, first-year students* | ALCOHOL | The self-reported GPA ranged from 1 to 4. | Yes |
| Meda et al. (2017)  USA | To examine the effects of concurrent alcohol and marijuana use on academic performance in college students | Longitudinal (2-year follow-up) | *Number: 1,138*  *Data: 672 females, 460 males, mean age 18.3 (18–23)*  *Settings: Trinity College, Hartford Hospital, and Yale University* | ALCOHOL, and MARIJUANA | From college reports on GPA data | Yes |
| Mekonen et al. (2017)  Ethiopia | To assess the prevalence of substance use (alcohol, tobacco, and khat) and its association with academic performance among university students | Cross-sectional | *Number: 725*  *Data: 243 females, 482 males, mean age 21.18 (± 1.79).*  *Setting: Wolaita Sodo University* | ALCOHOL, SMOKING, CATHA EDULIS | The self-reported GPA ranged from 1 to 4. | Yes |
| Tembo et al. (2017)  UK | To investigate the association between levels of drinking and mental health problems and academic performance among university students aged 18 to 24 years | Cross-sectional | *Number: 2,518*  *Data: 1,504 females, 908 males, ages 18–25*  *Setting: undergraduate students at the Curtin University Bentley campus* | ALCOHOL | The Academic Role Expectation and Alcohol Scale (AREAS) (McGee & Kypri, 2004) | No |
| Piazza-Gardner et al. (2016)  USA | To assess the relationship between alcohol consumption and academic performance among a nationally representative sample of college students | Longitudinal (11-year follow-up) | *Number: 23,518*  *Data: 15,757 females, 7,761 males, mean age 21.3 (± 5.31).*  *Setting: 44 public and private campuses throughout the United States* | ALCOHOL | Self-reported GPA from 1 to 4 | No |
| Nasui et al. (2015)  Romania | To analyse the alcohol consumption in Romanian university students and to describe the behaviours occurring after drinking | Cross-sectional (5-month follow-up) | *Number: 468*  *Data: 302 females, 166 males, mean age 21.9 (± 3.22)*  *Setting: two main universities in Romania* | ALCOHOL | Self-reported academic problems: skipping a class after drinking, missing a class after drinking, coming to a class after drinking, receiving a lower grade because of drinking | No |
| Liguori & Lonbaken (2015)  USA | To identify the relationships between alcohol consumption and retention among college students | Descriptive (7-month follow-up) | *Number: 820*  *Data: 289 females, 531 males, mean age 19.37 (± 2.99)*  *Setting: undergraduates in two Midwestern universities* | ALCOHOL | First-to-second-year student retention | No |
| El Ansari et al. (2013)  UK | To assess the associations between educational programme achievement and alcohol consumption | Descriptive (1-year follow-up) | *Number: 379*  *Data: mean age 22.9, (± 7.5)*  *Setting: undergraduate students at the University of Gloucestershire* | ALCOHOL | Self-reported importance to achieve a good grade and comparative appraisal of their performance in relation to peers | No |
| Pascarella et al. (2007)  USA | To assess the impacts of excessive alcohol consumption on academic performance | Longitudinal | *Number: 2,956 (1,569 seniors, 1,387 first year)*  *Data: 1,590 females, 1,366 males*  *Setting: first-year undergraduate and senior students in a public university in a small Midwestern city* | ALCOHOL | Time spent preparing for class and GPA from the university registrar’s office | No |

**Legend.** OR: Odd Ratio; CI: Confidence Interval; β: standardized regression coefficient; µ2: size of the effect; DSM-IV: Diagnostic and Statistical Manual of mental disorders- fourth version; GPA: Graduate Point Average; NR: Not Reported.
