# Supplementary material for: Substance abuse and academic performance among university students: systematic review and meta-analysis
Source: Research Square preprint supplement (doi:10.21203/rs.3.rs-6221134/v1), 2025-04-16
Supplement: Supplementary file 3 [file cd5bdecbffbcb209824f5da0.docx]

**Additional file 3 Risk of bias assessment**

|  |  | **Akua and Samek (2023)** | **Olorunleke et al. (2023)** | **Petkeviciene et al. (2022)** | **Lukas et al. (2021)** | **Ong et al. (2021)** | **Arria et al. (2020)** | **El Ansari et al. (2020)** | **Paramo et al. (2020)** | **Mercado et al. (2019)** | **Souza et al. (2019)** | **Portero de la Cruz** **& Cebrino Cruz (2018)** |
| --- | --- | --- | --- | --- | --- | --- | --- | --- | --- | --- | --- | --- |
| 1. **Aims/outcomes** | **2: explicitly described in article** | 2 | 2 | 2 | 2 | 2 | 2 | 2 | 2 | 2 | 2 | 2 |
| **1: implied in article** |  |  |  |  |  |  |  |  |  |  |  |
| **0: unclear** |  |  |  |  |  |  |  |  |  |  |  |
| 1. **Sample formation** | **2: random** | 2 |  |  |  |  |  |  |  |  |  |  |
| **1: quasi-random, sequential series, or total available** |  |  |  |  |  |  |  |  |  |  |  |
| **0: selected, historical, other** |  | 0 | 0 | 0 | 0 | 0 | 0 | 0 | 0 | 0 | 0 |
| 1. **Inclusion/exclusion** | **2: criteria clearly described** |  |  | 2 |  |  | 2 |  |  | 2 | 2 |  |
| **1: implied by patient characteristics, setting** | 1 |  |  | 1 |  |  |  | 1 |  |  | 1 |
| **0: unclear** |  | 0 |  |  | 0 |  | 0 |  |  |  |  |
| 1. **Sample characteristics** | **2: three or four characteristics** | 2 |  | 2 | 2 | 2 |  | 2 | 2 |  | 2 | 2 |
| **1: one or two characteristics** |  |  |  |  |  | 1 |  |  |  |  |  |
| **0: no characteristics** |  | 0 |  |  |  |  |  |  | 0 |  |  |
| 1. **Power of study calculated** | **2: yes, appropriate** |  |  |  |  |  |  |  |  |  |  |  |
| **1: yes, inappropriate** |  |  |  |  |  |  |  |  |  |  |  |
| **0: no** | 0 | 0 | 0 | 0 | 0 | 0 | 0 | 0 | 0 | 0 | 0 |
| 1. **Outcomes measures** | **2: objective or validated scale** | 2 |  | 2 |  |  |  |  | 2 |  |  |  |
| **1: subjective/self-report** |  |  |  | 1 | 1 | 1 | 1 |  | 1 | 1 | 1 |
| **0: not explicit** |  | 0 |  |  |  |  |  |  |  |  |  |

|  |  | **Akua and Samek (2023)** | **Olorunleke et al. (2023)** | **Petkeviciene et al. (2022)** | Lukas et al. (2021) | Ong et al. (2021) | Arria et al. (2020) | El Ansari et al. (2020) | Paramo et al. (2020) | Mercado et al. (2019) | Souza et al. (2019) | Portero de la Cruz & Cebrino Cruz (2018) |
| --- | --- | --- | --- | --- | --- | --- | --- | --- | --- | --- | --- | --- |
| 1. **Follow-up** | **2: >90% of patients enrolled/approached** |  |  | 2 | 2 | 2 | 2 | 2 | 2 | 2 | 2 | 2 |
| **1: 80%–90% of patients** | 1 |  |  |  |  |  |  |  |  |  |  |
| **0: <80% of patients/no information** |  | 0 |  |  |  |  |  |  |  |  |  |
| 1. **Analysis** | **2: intention to treat/including all available data** |  |  |  |  |  |  |  |  |  |  |  |
| **1: exclude dropouts but evidence of bias** |  |  |  |  |  | 1 |  |  |  |  |  |
| **0. adjusted or no bias evident** | 0 | 0 | 0 | 0 | 0 |  | 0 | 0 | 0 | 0 | 0 |
| **Total score (0–16) for observational studies** |  | 10 | 2 | 10 | 8 | 7 | 9 | 7 | 9 | 7 | 9 | 8 |

|  |  | **Hernandez-Serrano et al. (2018)** | **An et al. (2017)** | **Meda et al. (2017)** | **Mekonen et al. (2017)** | **Tembo et al. (2017)** | **Piazza Gardner et al. (2016)** | **Liguori & Lonbaken (2015)** | **Nasui et al. (2015)** | **El Ansari et al. (2013)** | **Pascarella et al. (2007)** |
| --- | --- | --- | --- | --- | --- | --- | --- | --- | --- | --- | --- |
| 1. **Aims/outcomes** | **2: explicitly described in article** | 2 | 2 | 2 | 2 | 2 | 2 | 2 | 2 | 2 | 2 |
| **1: implied in article** |  |  |  |  |  |  |  |  |  |  |
| **0: unclear** |  |  |  |  |  |  |  |  |  |  |
| 1. **Sample formation** | **2: random** |  |  |  |  | 2 |  |  | 2 |  |  |
| **1: quasi-random, sequential series, or total available** |  |  |  | 1 |  |  |  |  |  |  |
| **0: selected, historical, other** | 0 | 0 | 0 |  |  | 0 | 0 |  | 0 | 0 |
| 1. **Inclusion/exclusion** | **2: criteria clearly described** |  | 2 |  |  | 2 |  |  |  |  |  |
| **1: implied by patient characteristics, setting** | 1 |  |  | 1 |  | 1 | 1 | 1 | 1 | 1 |
| **0: unclear** |  |  | 0 |  |  |  |  |  |  |  |
| 1. **Sample characteristics** | **2: three or four characteristics** | 2 |  | 2 | 2 |  | 2 | 2 | 2 |  |  |
| **1: one or two characteristics** |  |  |  |  | 1 |  |  |  | 1 | 1 |
| **0: no characteristics** |  | 0 |  |  |  |  |  |  |  |  |
| 1. **Power of study calculated** | **2: yes, appropriate** |  |  |  |  |  |  |  |  |  |  |
| **1: yes, inappropriate** |  |  |  |  |  |  |  |  |  |  |
| **0: no** | 0 | 0 | 0 | 0 | 0 | 0 | 0 | 0 | 0 | 0 |
| 1. **Outcomes measures** | **2: objective or validated scale** |  |  | 2 |  |  |  | 2 |  |  | 2 |
| **1: subjective/self-report** | 1 | 1 |  | 1 | 1 | 1 |  | 1 | 1 |  |
| **0: not explicit** |  |  |  |  |  |  |  |  |  |  |
| 1. **Follow-up** | **2: >90% of patients enrolled/approached** | 2 |  | 2 |  | 2 | 2 | 2 | 2 | 2 | 2 |
| **1: 80%–90% of patients** |  |  |  |  |  |  |  |  |  |  |
| **0: <80% of patients/no information** |  | 0 |  | 0 |  |  |  |  |  |  |
| 1. **Analysis** | **2: intention to treat/including all available data** |  |  |  |  |  |  |  |  |  |  |
| **1: exclude dropouts but evidence of bias** |  |  |  |  |  |  |  |  |  |  |
| **0: adjusted or no bias evident** | 0 | 0 | 0 | 0 | 0 | 0 | 0 | 0 | 0 | 0 |
| **Total score (0–16) for observational studies** |  | 8 | 5 | 8 | 7 | 10 | 8 | 9 | 10 | 7 | 8 |
